# Supplementary material for: Hepatic Methionine Homeostasis Is Conserved in C57BL/6N Mice on High-Fat Diet Despite Major Changes in Hepatic One-Carbon Metabolism
Source: PubMed Central journal article supplement (PMC3589430; doi:10.1371/journal.pone.0057387), 2013-03-05
Supplement: pone.0057387.s001.pdf [file pone.0057387.s001.pdf]

Table S1. Composition of experimental diets.

|                           | <b>C</b> | <b>HF</b> |
|---------------------------|----------|-----------|
| Dry matter                | 952      | 971       |
| Crude protein             | 208      | 241       |
| Crude fat                 | 42       | 340       |
| Butter fat                | -        | -         |
| Beef tallow               | -        | 310       |
| Soybean oil               | 40       | 30        |
| Coconut fat               | -        | -         |
| Cocoa butter              | -        | -         |
| Crude fiber               | 50       | 60        |
| Crude ash                 | 56       | 61        |
| Starch                    | 468      | 22        |
| Sugar/dextrine            | 108      | 224       |
| N-free extracts           | 594      | 270       |
| GE [MJ/kg]                | 18       | 25.2      |
| ME [MJ/kg]                | 15       | 21.4      |
| % carbohydrate            | 66       | 21        |
| % protein                 | 23       | 19        |
| % fat                     | 11       | 60        |
| <b><i>Amino acids</i></b> |          |           |
| Lysine                    | 17.1     | 19.8      |
| Methionine                | 7.3      | 8.3       |
| Cystine                   | 0.9      | 4.6       |
| Methionine + Cystine      | 8.2      | 12.8      |
| Threonine                 | 9.3      | 10.7      |
| Tryptophan                | 2.7      | 3.1       |
| Arginine                  | 7.6      | 8.8       |
| Histidine                 | 6.6      | 7.6       |
| Valine                    | 14.2     | 16.4      |
| Isoleucine                | 10.9     | 12.5      |
| Leucine                   | 20.5     | 23.6      |
| Phenylalanine             | 11.1     | 12.9      |
| Phenylalanine + Tyrosine  | 22.2     | 25.7      |
| Glycine                   | 4.3      | 5.0       |
| Glutamic acid             | 46.9     | 54.1      |
| Aspartic acid             | 15.5     | 17.9      |

Table S1 continued

| <i>Amino acids</i>             | <b>C</b>   | <b>HF</b>  |
|--------------------------------|------------|------------|
| Proline                        | 23.9       | 27.6       |
| Alanine                        | 6.8        | 7.9        |
| Serine                         | 12.4       | 14.3       |
| <i>Vitamins</i>                |            |            |
| Vitamin A                      | 15000 IU   | 15000 IU   |
| Vitamin D3                     | 1500 IU    | 1500 IU    |
| Vitamin E                      | 150 mg/kg  | 150 mg/kg  |
| Vitamin K (as menadione)       | 20mg/kg    | 20mg/kg    |
| Vitamin C                      | 30 mg/kg   | 30 mg/kg   |
| Thiamin (B1)                   | 16 mg/kg   | 16 mg/kg   |
| Riboflavin (B2)                | 16 mg/kg   | 16 mg/kg   |
| Pyridoxine (B6)                | 18 mg/kg   | 18 mg/kg   |
| Cobalamin (B12)                | 30 µg/kg   | 30 µg/kg   |
| Nicotinic acid                 | 49 mg/kg   | 45 mg/kg   |
| Pantothenic acid               | 56 mg/kg   | 55 mg/kg   |
| Folic acid                     | 19 mg/kg   | 19 mg/kg   |
| Biotin                         | 310 µg/kg  | 310 µg/kg  |
| Choline-Chloride               | 1.04 g/kg  | 2.3 g/kg   |
| Inositol                       | 80 mg/kg   | 80 mg/kg   |
| Betaine                        | -          | -          |
| <i>Trace elements</i>          |            |            |
| Iron                           | 166 mg/kg  | 139 mg/kg  |
| Manganese                      | 98 mg/kg   | 82 mg/kg   |
| Zinc                           | 65 mg/kg   | 56 mg/kg   |
| Zinc sulfate                   | -          | -          |
| Copper                         | 14 mg/kg   | 12 mg/kg   |
| Iodine                         | 1.2 mg/kg  | 0.97 mg/kg |
| Selenium                       | 0.14 mg/kg | 0.13 mg/kg |
| Cobalt                         | 0.15 mg/kg | 0.13 mg/kg |
| <i>Fatty acids [% in diet]</i> |            |            |
| C12:0                          | -          | 0.03       |
| C14:0                          | 0.02       | 1.03       |
| C16:0                          | 0.45       | 8.06       |
| C17:0                          | -          | 0.38       |
| C18:0                          | 0.19       | 5.61       |
| C20:0                          | 0.02       | 0.04       |
| C16:1                          | 0.02       | 0.78       |
| C18:1                          | 1.07       | 12.13      |
| C20:1                          | -          | 0.01       |

**Table S1 continued**

| <b><i>Fatty acids [% in diet]</i></b> | <b>C</b> | <b>HF</b> |
|---------------------------------------|----------|-----------|
| <b>C18:2</b>                          | 2.12     | 2.37      |
| <b>C18:3</b>                          | 0.26     | 0.33      |
| <b>C20:4</b>                          | -        | 0.07      |

Nutrient compositions are reported by the manufacturer and are expressed as [g / kg], except it is delineated differently. The composition of the standard laboratory chow used for two weeks prior to the dietary intervention was: dry matter, 877; crude protein, 190; crude fat, 33; crude fiber, 49; crude ash, 64; starch, 365; sugar/dextrines, 47; N-free extracts, 541; GE, 16.3; ME, 12.8; % carbohydrate, 58; % protein, 33; % fat, 9. Abbreviations: GE, gross energy; ME, metabolizable energy calculated with the Atwater factors; N, nitrogen.
