# Supplementary material for: Hepatic Methionine Homeostasis Is Conserved in C57BL/6N Mice on High-Fat Diet Despite Major Changes in Hepatic One-Carbon Metabolism
Source: PubMed Central journal article supplement (PMC3589430; doi:10.1371/journal.pone.0057387), 2013-03-05
Supplement: pone.0057387.s002.pdf [file pone.0057387.s002.pdf]

**Table S2. Effect of HF diet feeding on nutrient and energy intake of experimental mice.**

|                                           | <b>C</b>      | <b>HF</b>      |
|-------------------------------------------|---------------|----------------|
| <b>Food intake [g]</b>                    | 306.6 ± 2.4   | 262.5 ± 2.3*   |
| <b>Energy intake [kcal]</b>               | 1317.9 ± 10.3 | 1579.9 ± 13.7* |
| <b>Protein intake [g]</b>                 | 63.8 ± 0.5    | 63.3 ± 0.55    |
| <b>Methionine intake [g]</b>              | 2.33 ± 0.02   | 2.26 ± 0.02*   |
| <b>Cystine intake [g]</b>                 | 0.28 ± 0.002  | 1.21 ± 0.01*   |
| <b>Choline chloride intake [g]</b>        | 0.319 ± 0.003 | 0.604 ± 0.005* |
| <b>Folate intake [mg]</b>                 | 6.13 ± 0.05   | 5.25 ± 0.05*   |
| <b>Vitamin B<sub>12</sub> intake [µg]</b> | 9.20 ± 0.07   | 7.88 ± 0.07*   |

Data are presented as mean ± SEM (n = 9 - 11). Asterisk indicates statistical significance ( $p < 0.05$ ).
