# Supplementary material for: Hepatic Methionine Homeostasis Is Conserved in C57BL/6N Mice on High-Fat Diet Despite Major Changes in Hepatic One-Carbon Metabolism
Source: PubMed Central journal article supplement (PMC3589430; doi:10.1371/journal.pone.0057387), 2013-03-05
Supplement: pone.0057387.s003.pdf [file pone.0057387.s003.pdf]

**Table S3. Mouse primer sequences for gene expression analysis in tissue.**

| <b>Symbol</b> | <b>Gene</b>                                     | <b>Forward primer (5' to 3')</b> | <b>Reverse primer (5' to 3')</b> |
|---------------|-------------------------------------------------|----------------------------------|----------------------------------|
| <b>Acox1</b>  | Acyl-coenzyme A oxidase 1                       | CCAATCATGCGATAGTCCTGGC           | CTTCAGGTAGCCATTATCCATCTC         |
| <b>Actb</b>   | Actin, beta                                     | CCACTGCCGCATCCTCTTCC             | GCCACAGGATTCCATACCCAAGA          |
| <b>Ahcy</b>   | S-adenosylhomocysteine hydrolase                | CAGCTTCTGTGAGGCATCCG             | AACTTGCTCTTGGTGACAGAATCG         |
| <b>Bhmt</b>   | Betaine-homocysteine methyltransferase          | GGAGGCTGCGCGTTGAAA               | CTAGTGGCAACTCGGGGTTCC            |
| <b>Bhmt2</b>  | Betaine-homocysteine methyltransferase 2        | CAT CCA AGT GCA GTT CGT CAA CT   | TGC ATT CAC AGC TTC CCA CTT G    |
| <b>Cbs</b>    | Cystathionine $\beta$ -synthase                 | CACAGTGCTGACCAAATCCCCC           | CACACTTGCCCAAGAGCTCAC            |
| <b>Chdh</b>   | Choline dehydrogenase                           | CACGTCAGGCTGGCTACCC              | GCAAGTAGGCGCAGGCTG               |
| <b>Cpt1a</b>  | Carnitine palmitoyltransferase 1a               | GTCCCAGCTGTCAAAGATACCG           | ATGGCGTAGTAGTTGCTGTTAACC         |
| <b>Csad</b>   | Cysteine sulfinic acid decarboxylase            | GAGGACCTGGAGAGGCAGATC            | CAAACATCGGCAATTGCATCCAG          |
| <b>Cth</b>    | Cystathionase                                   | GCTAGAGGCAGCGATTACACC            | GCAGACATGAAGGTGTTATCTACAACC      |
| <b>Dmgdh</b>  | Dimethylglycine dehydrogenase precursor         | GGCACGCAGCAGGTTTAAACAAC          | GGAATCCCACCACCTGTCCGG            |
| <b>Dnmt1</b>  | DNA methyltransferase 1                         | GGAAGGCTACCTGGCTAAAGTCAAG        | GGGTGTCCTGTCCGACTTGC             |
| <b>Dnmt3a</b> | DNA methyltransferase 3A                        | TGGAGAATGGCTGCTGTGTGAC           | CACTCATCCCCTTTCCGTTTG            |
| <b>Dnmt3b</b> | DNA methyltransferase 3B                        | AGTGACCAGTCCTCAGACACGAAG         | ATCAGAGCCATTCCCATCATCTAC         |
| <b>Gapdh</b>  | Glyceraldehyde-3-phosphate dehydrogenase        | CCTGGAGAAACCTGCCAAGTATG          | GAGTGGGAGTTGCTGTTGAAGTC          |
| <b>Gclc</b>   | Glutamate-cysteine ligase, catalytic subunit    | AGCATCAGGCTCTCTGCACC             | TTCTCCTCTCCGATGCCGG              |
| <b>Gnmt</b>   | Glycine N-methyltransferase                     | GCCAGACTGCAAAGGTGACCA            | GTCGTAATGTCCTTGGTCAGGTCA         |
| <b>Got1</b>   | Glutamate oxaloacetate transaminase 1, soluble  | GAGCTGTGCTTCTCGCCTAG             | TCCCAGGTTGGTGATGATACGTAG         |
| <b>Gss</b>    | Glutathione synthetase                          | CCTATGCTGTGCAGATGGACTTC          | CAAAGAGACGGGCAGTATAGTCG          |
| <b>Hprt</b>   | Hypoxanthine guanine phosphoribosyl transferase | GTCGTGATTAGCGATGATGAACC          | GTCTTTCAGTCCTGTCCATAATCAG        |

Table S3 continued

| Symbol       | Gene                                                               | Forward primer (5' to 3') | Reverse primer (5' to 3') |
|--------------|--------------------------------------------------------------------|---------------------------|---------------------------|
| <b>Mat1a</b> | Methionine<br>adenosyltransferase I,<br>alpha                      | GTGGCCTGTGAGACAGTGTGC     | TGCTCTCACCACCCGCTGG       |
| <b>Mat2a</b> | Methionine<br>adenosyltransferase II,<br>alpha                     | AAGTGGCTTGTGAAACTGTTGCT   | CTGGGCAATATCTGGTGACTGTTG  |
| <b>Mthfr</b> | 5,10-<br>methylenetetrahydrofolate<br>reductase                    | GACATCTGTGTGGCAGGTTACCC   | CTGAAGAAGGTGCTGGCCTC      |
| <b>Mtr</b>   | 5-<br>methyltetrahydrofolate-<br>homocysteine<br>methyltransferase | GCTGGTGGACTACATTGACTGGA   | TTCTGGCTTCTTCACCTACTGC    |
| <b>Pemt</b>  | Phosphatidylethanolam<br>ine N-<br>methyltransferase               | CTGGAATGTGGTAGCGAGATGG    | CAGTGGGAGCGGAGGATGTTCC    |
| <b>Ppara</b> | Peroxisome proliferator<br>activated receptor $\alpha$             | CCAGTACTTAGGAAGCTGTCCG    | TATTCGACACTCGATGTTTCAGGG  |
| <b>Shmt1</b> | Serine<br>hydroxymethyltransferase 1 (soluble)                     | CTGCGGAAGATTGCGGATGAT     | GTCTTGGGATCCACACTGCGC     |
| <b>Shmt2</b> | Serine<br>hydroxymethyltransferase 2 (mitochondrial)               | CCTATGCCCGCCTCATTGACT     | TTCCGGTAGAAGATGAGCCCTG    |
| <b>Ucp2</b>  | Uncoupling protein 2                                               | GCAGATCCAAGGGGAGAGTCAA    | CCGGCGACCAGCCCATTG        |
