# Supplementary material for: Hepatic Methionine Homeostasis Is Conserved in C57BL/6N Mice on High-Fat Diet Despite Major Changes in Hepatic One-Carbon Metabolism
Source: PubMed Central journal article supplement (PMC3589430; doi:10.1371/journal.pone.0057387), 2013-03-05
Supplement: pone.0057387.s004.pdf [file pone.0057387.s004.pdf]

**Table S4. Primer sequences for gene expression analysis in rat hepatoma cells (Fao).**

| <b>Symbol</b> | <b>Gene</b>                                  | <b>Forward primer (5' to 3')</b> | <b>Reverse primer (5' to 3')</b> |
|---------------|----------------------------------------------|----------------------------------|----------------------------------|
| <b>Bhmt</b>   | Betaine-homocysteine methyltransferase       | AGGCTGCGGTGGAGCACC               | AGATATCTTCTCTGCCACGTAGTTC        |
| <b>Cbs</b>    | Cystathionine $\beta$ -synthase<br>Carnitine | CGTAGGAGTGGCATGGCGAC             | TTCCCGTCGCACTGCTGC               |
| <b>Cpt1a</b>  | palmitoyltransferase<br>1a                   | GAGCCGCAGCACCAAGATC              | TCTTCCTTCATCAGTGGCCTCAC          |
| <b>Gus</b>    | $\beta$ -glucuronidase                       | GCATGAGCATCCAGCCTACC             | GAACTTGCTCTTTGTGACAGCC           |
