# Supplementary material for: Hepatic Methionine Homeostasis Is Conserved in C57BL/6N Mice on High-Fat Diet Despite Major Changes in Hepatic One-Carbon Metabolism
Source: PubMed Central journal article supplement (PMC3589430; doi:10.1371/journal.pone.0057387), 2013-03-05
Supplement: pone.0057387.s005.pdf [file pone.0057387.s005.pdf]

**Table S5. MS-qPCR primer sequences for local DNA methylation analysis.**

| <b>Symbol</b> | <b>Primer name</b>                                                               | <b>Forward primer (5' to 3')</b> | <b>Reverse primer (5' to 3')</b> |
|---------------|----------------------------------------------------------------------------------|----------------------------------|----------------------------------|
| <b>Chr18*</b> | Chromosome 18                                                                    | GCAATCAGGCTTGTAGCAGTT            | CATATGCACCATGTGTCTTGG            |
| <b>Cbs P1</b> | Cystathionine $\beta$ -<br>synthase promoter<br>region 1                         | GGTGAGTGGGAGGCCGTTCT             | TGGAGAGCACGCTCGGAC               |
| <b>Cbs P2</b> | Cystathionine $\beta$ -<br>synthase promoter<br>region 2                         | GTCCGAGCGTGCTCTCCA               | TTAGCGAGCTGCGCGTC                |
| <b>Cbs I7</b> | Cystathionine $\beta$ -<br>synthase intragenic<br>region 7)                      | GCTGCTTACTGTAGGACTTGTG           | GCACCGTCACACTGCTGC               |
| <b>Zrsr1*</b> | Zinc finger (CCCH<br>type), RNA binding<br>motif and<br>serine / arginine rich 1 | GGCCGTACCACAGATAACCA             | GCGCAGTTATCCGTCTATCCA            |

\* Primer sequences as used by Oakes et al. [28].
