# Supplementary material for: Hepatic Methionine Homeostasis Is Conserved in C57BL/6N Mice on High-Fat Diet Despite Major Changes in Hepatic One-Carbon Metabolism
Source: PubMed Central journal article supplement (PMC3589430; doi:10.1371/journal.pone.0057387), 2013-03-05
Supplement: pone.0057387.s006.pdf [file pone.0057387.s006.pdf]

**Table S6. Primer sequences used for quantification of individual CpG-site DNA methylation analysis by bisulfite genomic pyrosequencing.**

| <b>Symbol</b>          | <b>Primer name</b>                      | <b>Forward primer (5'-3')</b>           | <b>Reverse primer (5'-3')</b>                   |
|------------------------|-----------------------------------------|-----------------------------------------|-------------------------------------------------|
| <b>Cbs fst</b>         | Cbs forward strand                      | AGGTTGTGTAGTAAGGTAT<br>AGATTTTTGGGTATAG | <b>B-</b><br>CTCTCCACCCCACTCTA<br>ACTC          |
| <b>Cbs fst<br/>seq</b> | Cbs forward strand<br>sequencing primer | GGTATAGATTTGGGGTTTT                     |                                                 |
| <b>Cbs rst</b>         | Cbs reverse strand                      | TTTTATAGAGGGGTGTTTG<br>TTGTTTTGGGAGTTG  | <b>B-</b><br>ACTAACCCAAACCTCTCA<br>AACCAATTACTT |
| <b>Cbs rst<br/>seq</b> | Cbs reverse strand<br>sequencing primer | TTGTTTTGGGAGTTGT                        |                                                 |

fst, forward genomic DNA strand; rst, reverse genomic DNA strand; B, biotinylation.
