# Supplementary material for: Hepatic Methionine Homeostasis Is Conserved in C57BL/6N Mice on High-Fat Diet Despite Major Changes in Hepatic One-Carbon Metabolism
Source: PubMed Central journal article supplement (PMC3589430; doi:10.1371/journal.pone.0057387), 2013-03-05
Supplement: pone.0057387.s007.pdf [file pone.0057387.s007.pdf]

**Table S7. Effect of HF feeding on hepatic metabolite concentrations.**

| <b>Metabolite<br/>[<math>\mu\text{mol/g protein}</math>]</b> | <b>C</b>          | <b>HF</b>          |
|--------------------------------------------------------------|-------------------|--------------------|
| <b>1MHis</b>                                                 | 0.36 $\pm$ 0.02   | 0.47 $\pm$ 0.05    |
| <b>Aad</b>                                                   | 0.52 $\pm$ 0.07   | 0.56 $\pm$ 0.08    |
| <b>Abu</b>                                                   | 0.96 $\pm$ 0.14   | 0.47 $\pm$ 0.04*   |
| <b>Ala</b>                                                   | 70.30 $\pm$ 3.48  | 77.87 $\pm$ 4.21   |
| <b>Asn</b>                                                   | 2.39 $\pm$ 0.16   | 2.72 $\pm$ 0.18    |
| <b>Asp</b>                                                   | 3.20 $\pm$ 0.27   | 2.71 $\pm$ 0.30    |
| <b>bAib</b>                                                  | 0.13 $\pm$ 0.01   | 0.10 $\pm$ 0.01    |
| <b>Cit</b>                                                   | 0.71 $\pm$ 0.08   | 0.38 $\pm$ 0.03*   |
| <b>Cys<sup>a</sup></b>                                       | 0.28 $\pm$ 0.02   | 0.27 $\pm$ 0.03    |
| <b>EtN</b>                                                   | 0.35 $\pm$ 0.02   | 0.33 $\pm$ 0.03    |
| <b>GABA</b>                                                  | 0.22 $\pm$ 0.01   | 0.23 $\pm$ 0.02    |
| <b>Gln</b>                                                   | 38.43 $\pm$ 2.95  | 53.07 $\pm$ 3.71*  |
| <b>Glu</b>                                                   | 13.96 $\pm$ 0.77  | 18.19 $\pm$ 1.91   |
| <b>Gly</b>                                                   | 32.00 $\pm$ 1.16  | 28.75 $\pm$ 1.23   |
| <b>His</b>                                                   | 7.99 $\pm$ 0.57   | 7.91 $\pm$ 0.61    |
| <b>Hyp</b>                                                   | 0.34 $\pm$ 0.02   | 0.24 $\pm$ 0.02*   |
| <b>Ile</b>                                                   | 4.13 $\pm$ 0.32   | 3.80 $\pm$ 0.29    |
| <b>Leu</b>                                                   | 7.03 $\pm$ 0.55   | 6.53 $\pm$ 0.48    |
| <b>Lys</b>                                                   | 9.04 $\pm$ 0.71   | 7.69 $\pm$ 0.51    |
| <b>Met</b>                                                   | 1.37 $\pm$ 0.26   | 0.96 $\pm$ 0.24    |
| <b>Orn</b>                                                   | 3.65 $\pm$ 0.31   | 2.64 $\pm$ 0.19*   |
| <b>PEtN</b>                                                  | 3.60 $\pm$ 0.23   | 3.98 $\pm$ 0.36    |
| <b>Phe</b>                                                   | 2.18 $\pm$ 0.19   | 2.41 $\pm$ 0.21    |
| <b>Pro</b>                                                   | 5.69 $\pm$ 0.80   | 5.57 $\pm$ 0.52    |
| <b>Sar</b>                                                   | 0.88 $\pm$ 0.15   | 0.83 $\pm$ 0.03    |
| <b>Ser</b>                                                   | 3.48 $\pm$ 0.33   | 3.57 $\pm$ 0.27    |
| <b>Tau</b>                                                   | 125.56 $\pm$ 4.31 | 158.38 $\pm$ 6.68* |
| <b>Thr</b>                                                   | 4.43 $\pm$ 0.49   | 4.40 $\pm$ 0.34    |
| <b>Trp</b>                                                   | 0.66 $\pm$ 0.05   | 0.65 $\pm$ 0.05    |
| <b>Tyr</b>                                                   | 2.51 $\pm$ 0.13   | 2.22 $\pm$ 0.19    |
| <b>Val</b>                                                   | 7.84 $\pm$ 0.56   | 6.95 $\pm$ 0.54    |

Data are presented as mean  $\pm$  SEM (n = 9 - 11). Asterisk indicates statistical significance (p < 0.05).

a, below quantification limit. Abbreviations: 1MHis, 1-methyl-L-histidine; Aad, L- $\alpha$ -amino adipic acid; Abu, L- $\alpha$ -amino-n-butyrate; Ala, L-alanine; Asn, L-asparagine; Asp, L-asparic acid; bAib, D,L- $\beta$ -aminoisobutyrate; Cit, L-citrulline; Cys, L-cysteine; EtN, ethanolamine; GABA,  $\gamma$ -amino-n-butyrate; Gln, L-glutamine; Glu, L-glutamate; Gly, glycine; His, L-histidine; Hyp, hydroxyproline; Ile, L-isoleucine; Leu, L-leucine; Lys, L-lysine; Met, L-methionine; Orn, L-ornithine; PEtN, O-phosphoethanolamine; Phe, L-phenylalanine; Pro, L-proline; Sar, sarcosine; Ser, L-serine; Tau, taurine; Thr, L-threonine; Trp, L-tryptophane; Tyr, L-tyrosine; Val, L-valine.
